# Supplementary material for: Nanoporous MIL-101(Cr) as a sensing layer coated on a quartz crystal microbalance (QCM) nanosensor to detect volatile organic compounds (VOCs)
Source: PubMed Central journal article supplement — RSC Adv. 2019 Aug 7;9(42):24460–70. doi: 10.1039/c9ra04152d (PMC9069610; doi:10.1039/c9ra04152d), 2019-08-07
Supplement: RA-009-C9RA04152D-s001.pdf [file RA-009-C9RA04152D-s001.pdf]

### Supplementary Information

#### Nanoporous MIL-101(Cr) as a sensing layer coated on quartz crystal microbalance (QCM) nanosensor to detect volatile organic compounds (VOCs)

Elahe Haghighi,<sup>a</sup> Sedigheh Zeinali<sup>\*a</sup>

\*Corresponding author: \*[zeinali@shirazu.ac.ir](mailto:zeinali@shirazu.ac.ir)

<sup>a</sup>Department of Nanochemical Engineering, Faculty of Advanced Technologies, Shiraz University, Shiraz, Iran

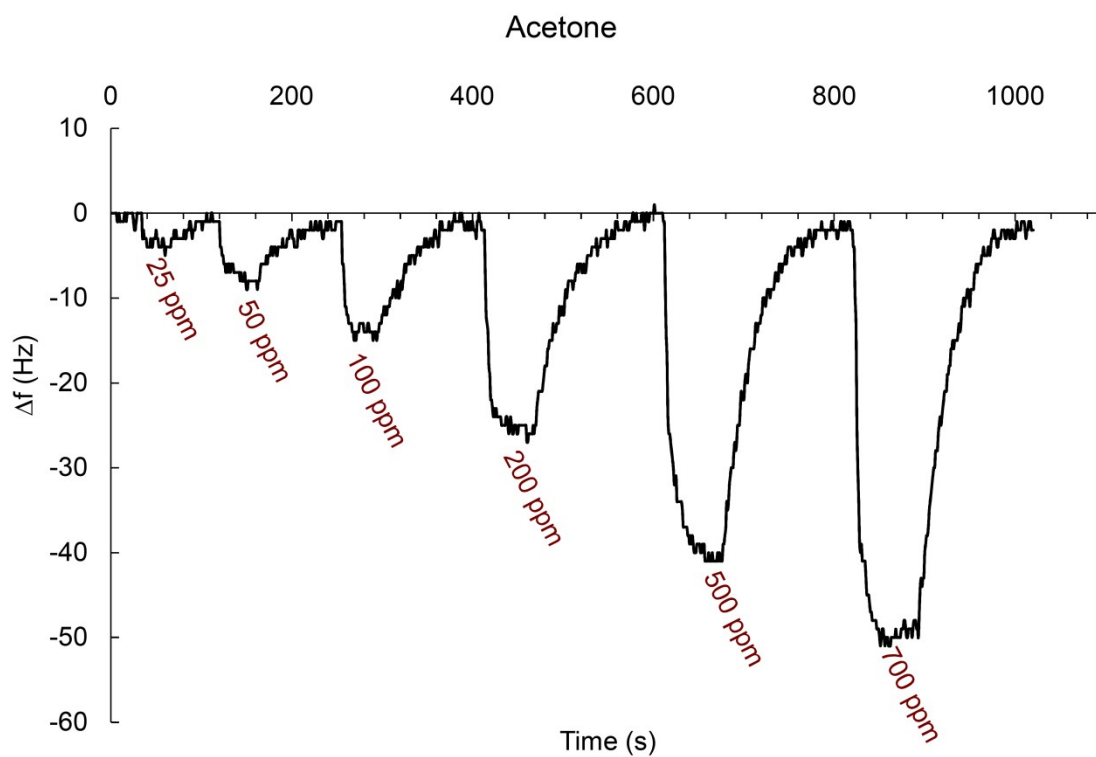

Fig. S1. Real-time sensor responses to acetone

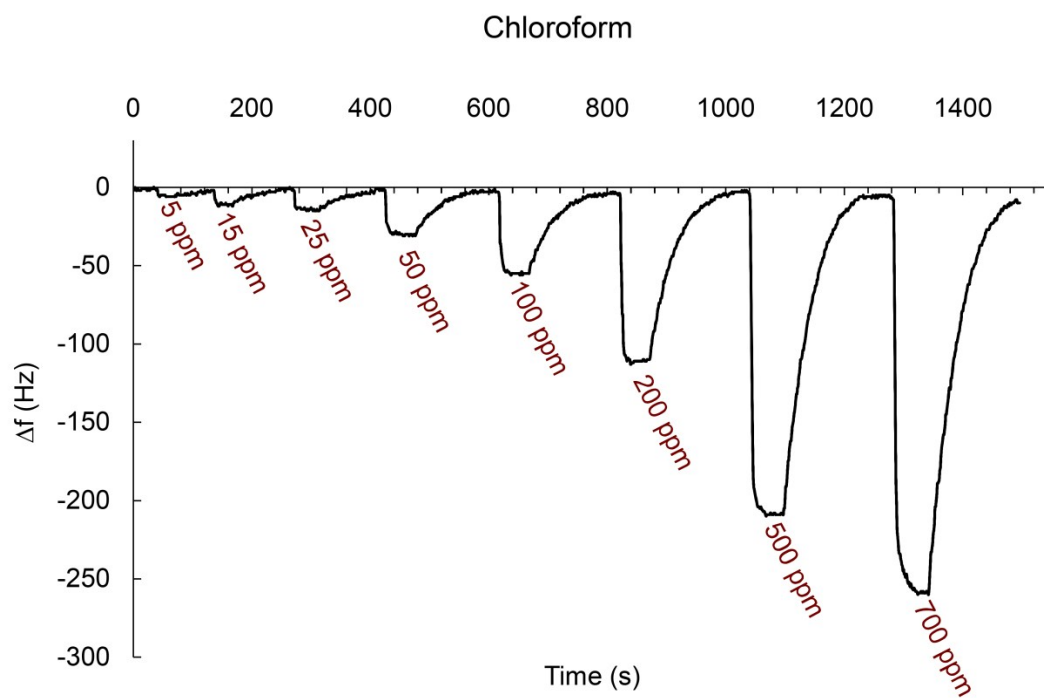

Fig. S2. Real-time sensor responses to chloroform

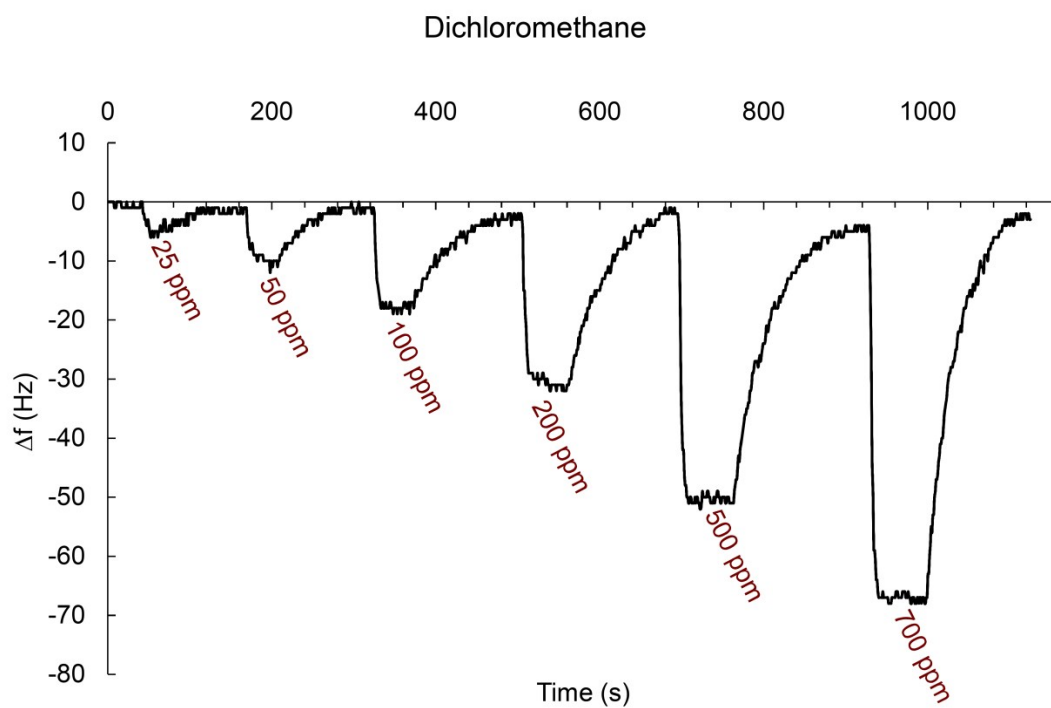

Fig. S3. Real-time sensor responses to dichloromethane

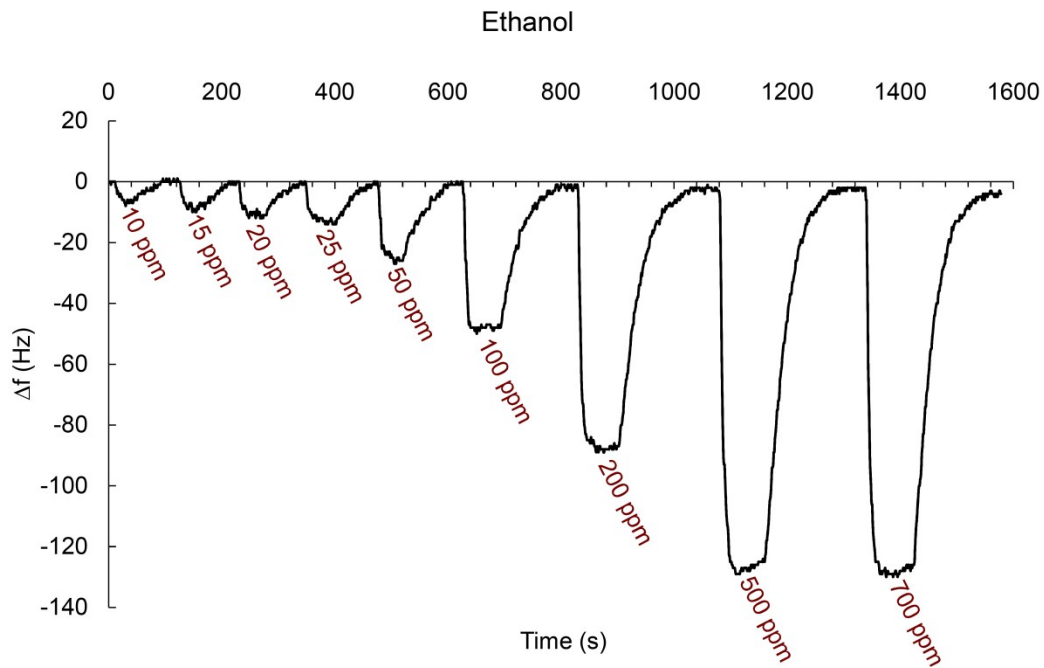

Fig. S4. Real-time sensor responses to ethanol

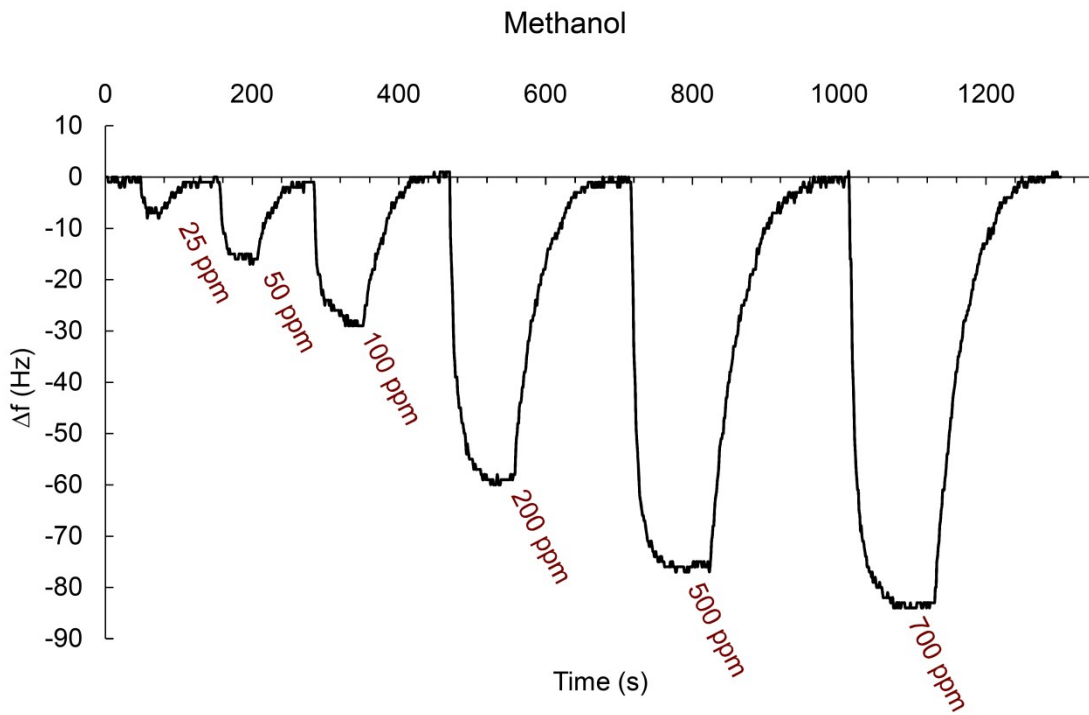

Fig. S5. Real-time sensor responses to methanol

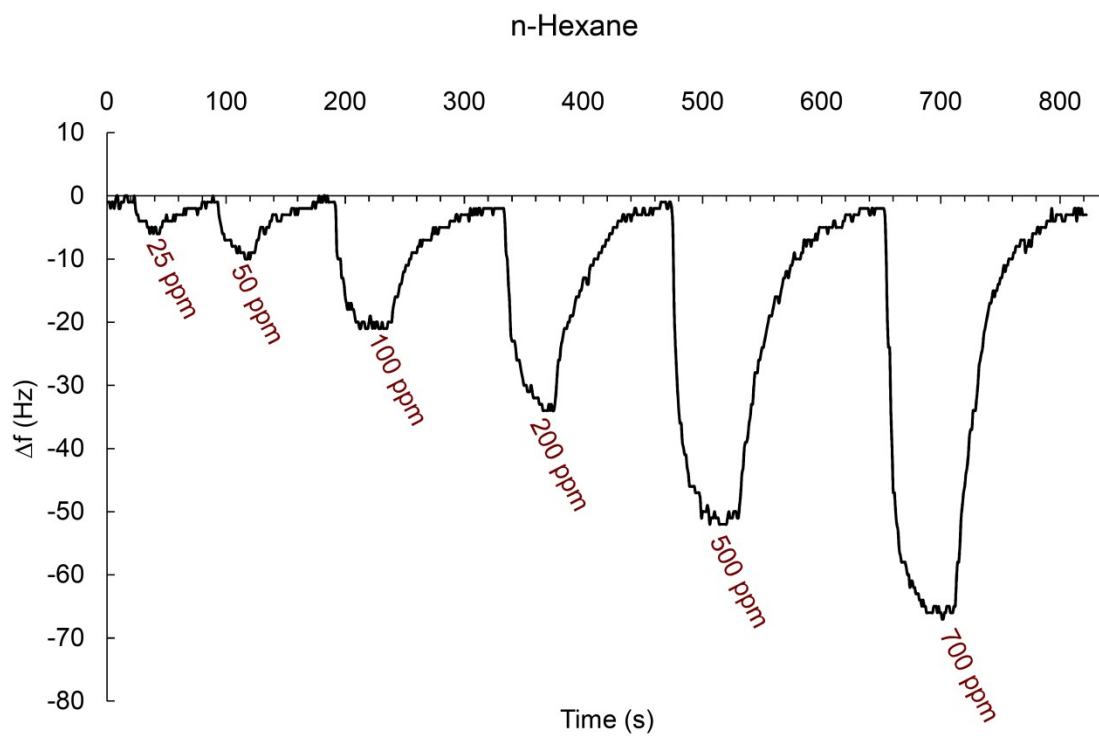

**Fig. S6.** Real-time sensor responses to n-hexane

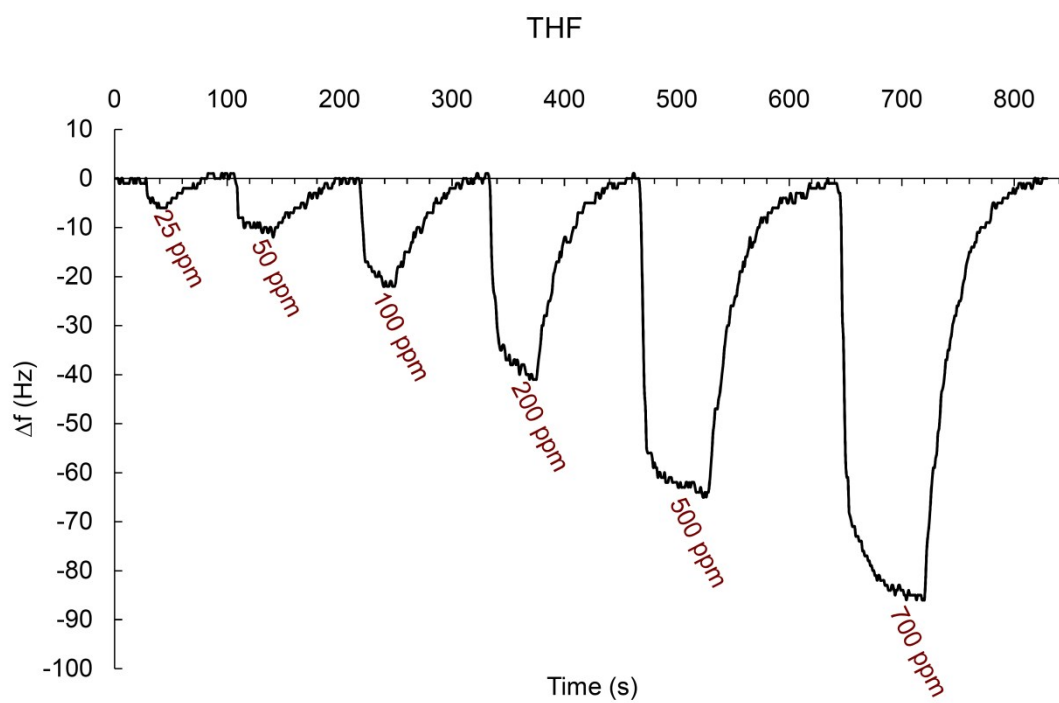

**Fig. S7.** Real-time sensor responses to THF

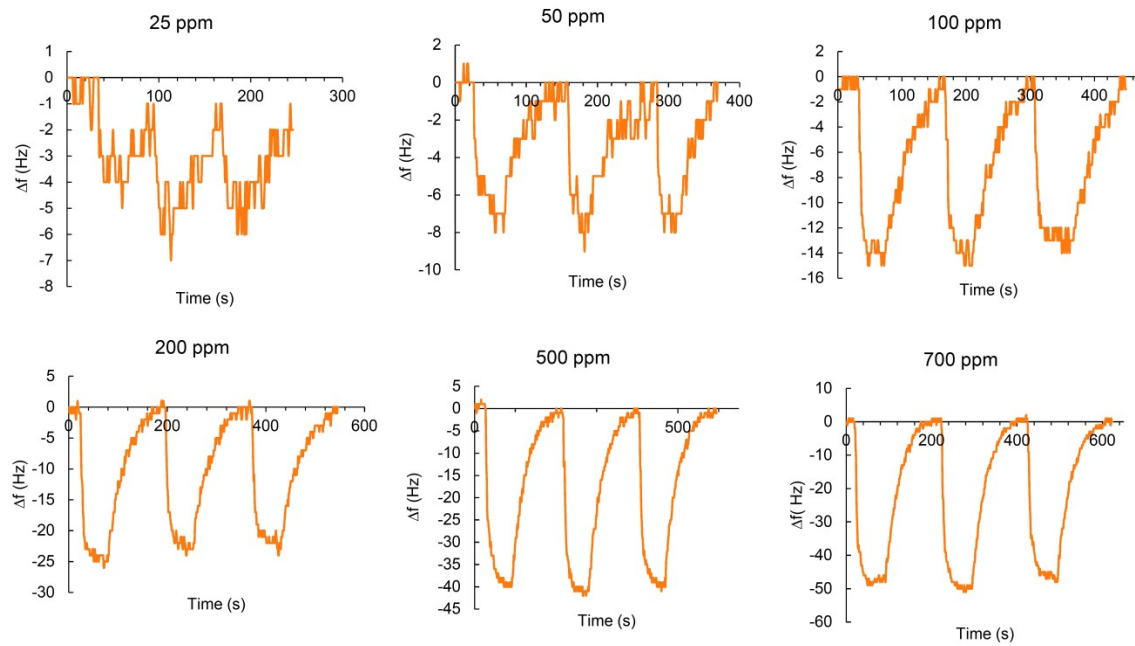

**Fig. S8.** Reversibility and repeatability of sensor response versus time to acetone

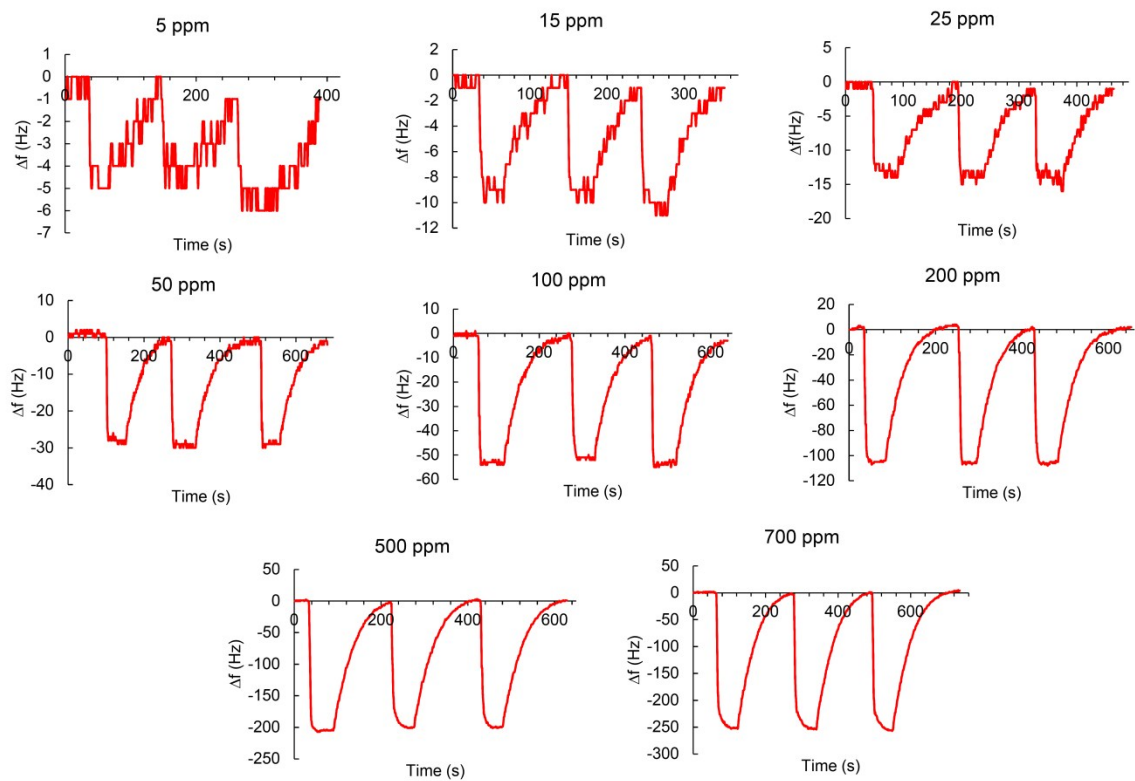

**Fig. S9.** Reversibility and repeatability of sensor response versus time to chloroform

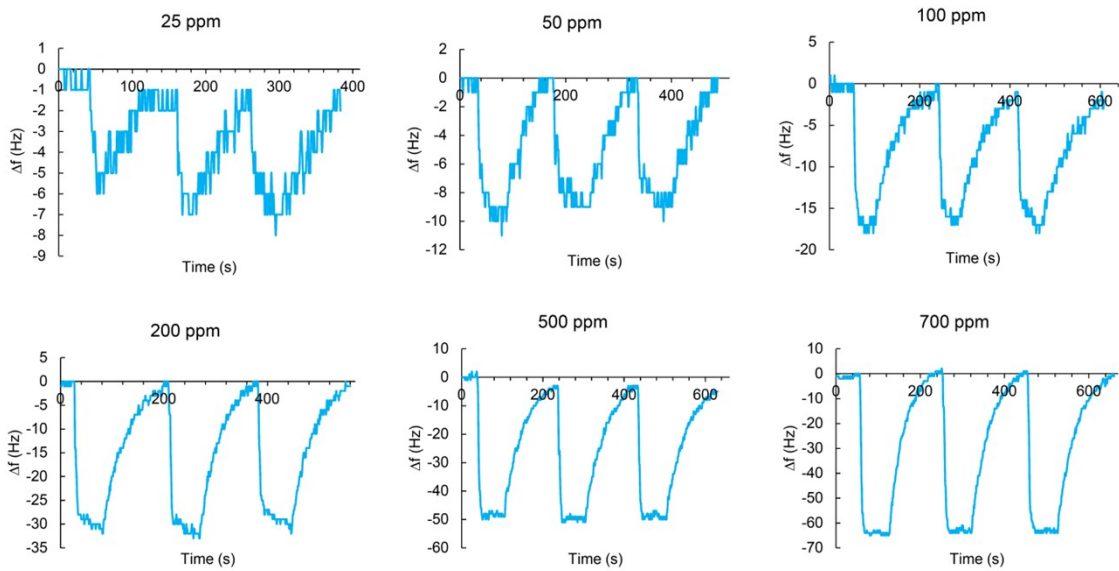

**Fig. S10.** Reversibility and repeatability of sensor response versus time to dichloromethane

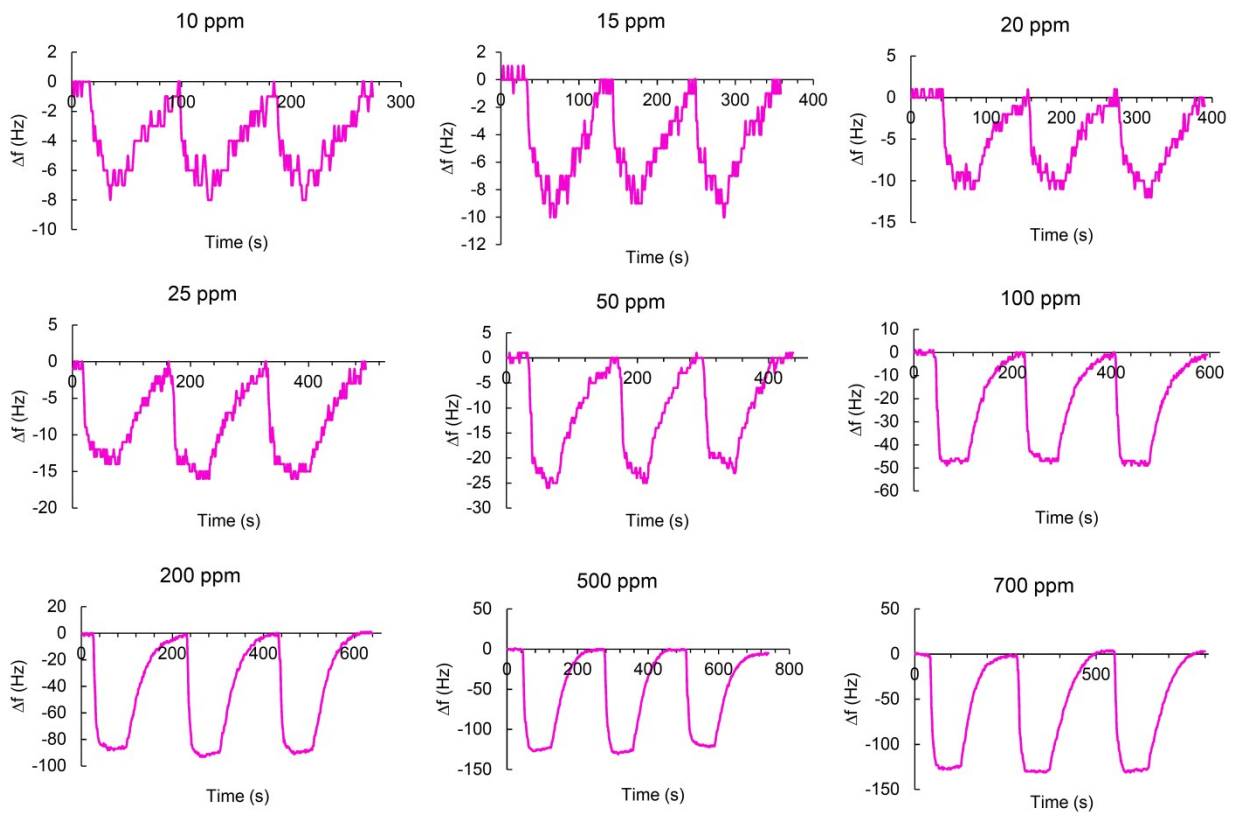

**Fig. S11.** Reversibility and repeatability of sensor response versus time to ethanol

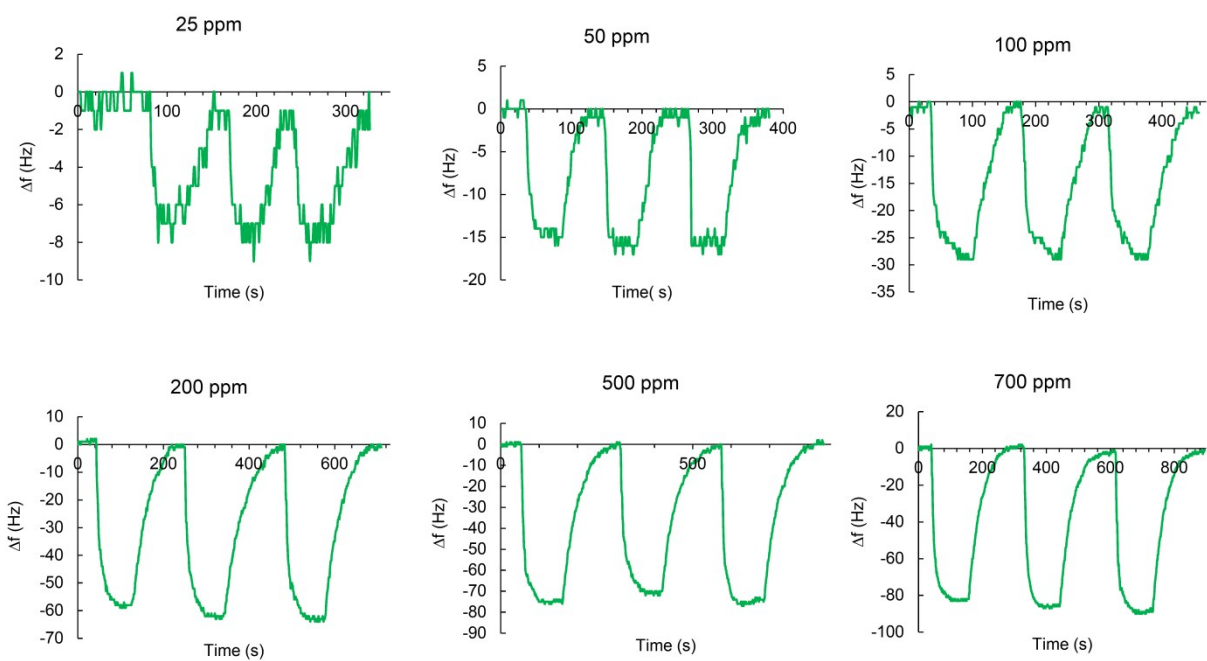

**Fig. S12.** Reversibility and repeatability of sensor response versus time to methanol

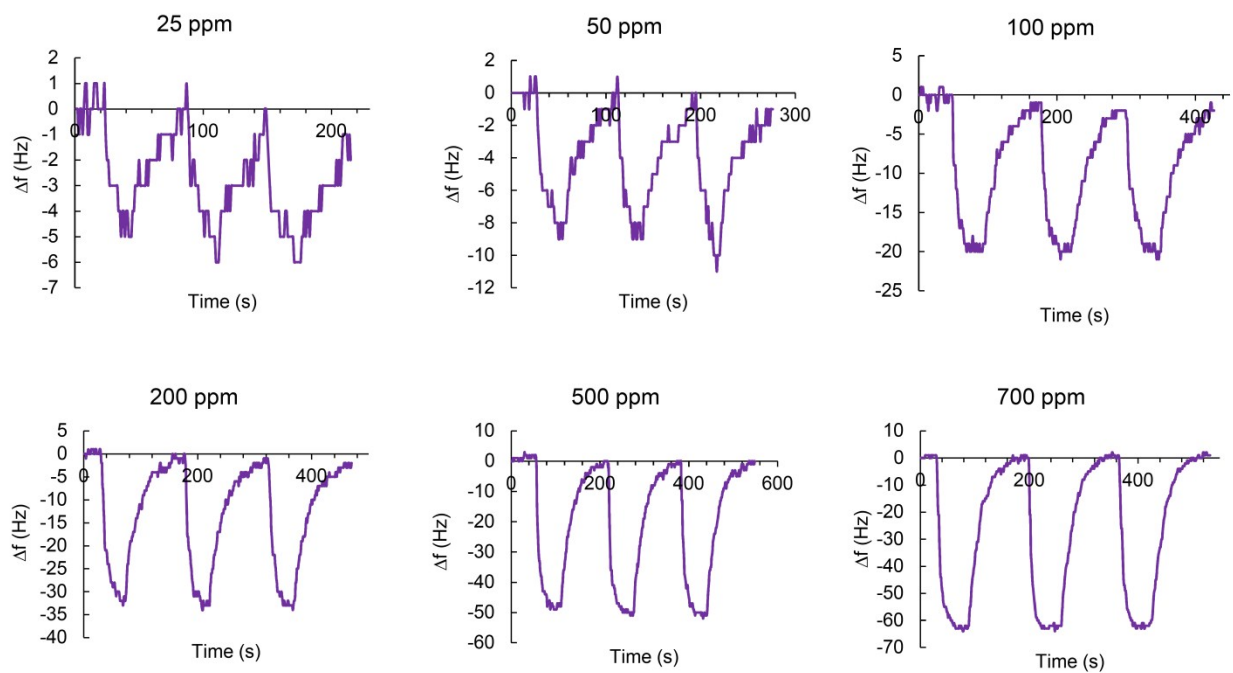

**Fig. S13.** Reversibility and repeatability of sensor response versus time to n-hexane

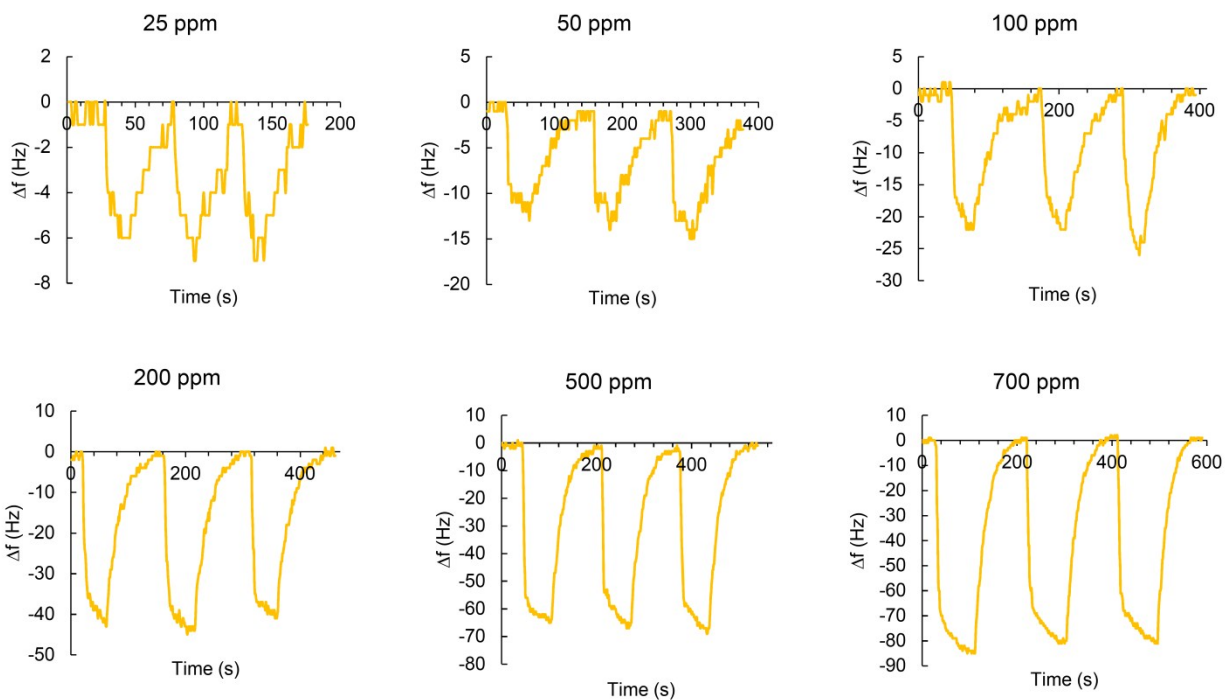

**Fig. S14.** Reversibility and repeatability of sensor response versus time to THF

**Table S1.** Sensor mean response and response/recovery time with standard deviation to different analytes in different concentration ranges of 3 adsorption/desorption cycles

| Analyte    | Concentration (ppm) | $\Delta F$ (Hz)   | Response time (s) | Recovery time (s) |
|------------|---------------------|-------------------|-------------------|-------------------|
| Methanol   | 25.00               | $7.00 \pm 0.00$   | $7.67 \pm 0.58$   | $20.33 \pm 0.58$  |
|            | 50.00               | $15.67 \pm 0.58$  | $7.67 \pm 3.06$   | $22.67 \pm 0.58$  |
|            | 100.00              | $28.67 \pm 0.58$  | $23.67 \pm 1.15$  | $45.33 \pm 1.53$  |
|            | 200.00              | $61.33 \pm 1.53$  | $23.33 \pm 0.58$  | $79.67 \pm 13.32$ |
|            | 500.00              | $73.67 \pm 3.21$  | $25.67 \pm 3.79$  | $83.33 \pm 4.16$  |
|            | 700.00              | $85.33 \pm 1.15$  | $24.00 \pm 1.00$  | $79.00 \pm 6.56$  |
| Ethanol    | 10.00               | $7.00 \pm 0.00$   | $10.00 \pm 3.00$  | $38.33 \pm 0.58$  |
|            | 15.00               | $9.00 \pm 0.00$   | $12.00 \pm 2.00$  | $43.00 \pm 6.24$  |
|            | 20.00               | $12.00 \pm 1.00$  | $14.00 \pm 1.00$  | $46.67 \pm 0.58$  |
|            | 25.00               | $14.33 \pm 0.58$  | $14.67 \pm 1.53$  | $54.33 \pm 1.15$  |
|            | 50.00               | $24.00 \pm 2.00$  | $13.33 \pm 2.08$  | $55.33 \pm 5.13$  |
|            | 100.00              | $46.33 \pm 1.15$  | $14.33 \pm 0.58$  | $70.67 \pm 2.89$  |
|            | 200.00              | $87.67 \pm 1.53$  | $15.00 \pm 1.00$  | $71.00 \pm 5.00$  |
|            | 500.00              | $122.67 \pm 3.06$ | $15.67 \pm 0.58$  | $73.67 \pm 5.86$  |
| 700.00     | $122.67 \pm 3.06$   | $16.67 \pm 0.58$  | $87.67 \pm 16.20$ |                   |
| 2-Propanol | 5.00                | $4.67 \pm 0.58$   | $7.00 \pm 1.73$   | $29.67 \pm 10.41$ |
|            | 10.00               | $8.00 \pm 0.00$   | $7.67 \pm 0.58$   | $37.33 \pm 3.06$  |
|            | 15.00               | $11.67 \pm 0.58$  | $7.67 \pm 0.58$   | $43.33 \pm 5.86$  |
|            | 20.00               | $14.33 \pm 0.58$  | $7.33 \pm 1.15$   | $53.67 \pm 1.53$  |
|            | 25.00               | $17.67 \pm 0.58$  | $8.33 \pm 0.58$   | $55.00 \pm 2.00$  |



|                 |               |               |               |               |
|-----------------|---------------|---------------|---------------|---------------|
|                 | 50.00         | 33.00 ± 0.00  | 9.33 ± 0.58   | 56.00 ± 5.20  |
|                 | 100.00        | 66.00 ± 2.00  | 9.00 ± 0.00   | 57.00 ± 1.00  |
|                 | 200.00        | 95.67 ± 1.53  | 10.00 ± 1.00  | 60.33 ± 6.11  |
|                 | 500.00        | 117.33 ± 1.15 | 11.00 ± 1.73  | 81.67 ± 9.87  |
|                 | 700.00        | 142.33 ± 1.15 | 13.33 ± 1.15  | 86.00 ± 1.73  |
| Acetone         | 25.00         | 4.00 ± 0.00   | 6.33 ± 0.58   | 25.33 ± 5.86  |
|                 | 50.00         | 7.00 ± 0.00   | 6.33 ± 1.15   | 37.00 ± 2.65  |
|                 | 100.00        | 12.67 ± 0.58  | 10.00 ± 3.61  | 57.00 ± 6.56  |
|                 | 200.00        | 23.33 ± 0.58  | 13.67 ± 3.51  | 64.00 ± 1.00  |
|                 | 500.00        | 40.00 ± 1.00  | 18.67 ± 4.73  | 64.67 ± 1.15  |
| Dichloromethane | 700.00        | 49.33 ± 1.53  | 19.67 ± 3.21  | 66.67 ± 2.52  |
|                 | 25.00         | 5.33 ± 0.58   | 8.00 ± 1.00   | 30.33 ± 9.02  |
|                 | 50.00         | 9.33 ± 0.58   | 9.00 ± 1.00   | 54.67 ± 3.06  |
|                 | 100.00        | 16.33 ± 0.58  | 9.67 ± 2.52   | 74.67 ± 9.07  |
|                 | 200.00        | 31.67 ± 1.15  | 11.00 ± 0.00  | 78.67 ± 8.39  |
| Chloroform      | 500.00        | 48.67 ± 2.08  | 11.33 ± 1.15  | 84.33 ± 2.52  |
|                 | 700.00        | 64.00 ± 1.00  | 12.33 ± 0.58  | 84.67 ± 2.08  |
|                 | 5.00          | 4.00 ± 0.00   | 3.67 ± 0.58   | 42.33 ± 3.21  |
|                 | 15.00         | 9.33 ± 0.58   | 3.67 ± 0.58   | 47.67 ± 5.51  |
|                 | 25.00         | 14.33 ± 0.58  | 5.67 ± 0.58   | 65.67 ± 7.77  |
|                 | 50.00         | 28.33 ± 0.58  | 6.33 ± 0.58   | 70.67 ± 7.02  |
|                 | 100.00        | 52.67 ± 0.58  | 8.00 ± 1.00   | 80.67 ± 2.08  |
| n-Hexane        | 200.00        | 106.00 ± 0.00 | 9.00 ± 0.00   | 81.67 ± 2.08  |
|                 | 500.00        | 202.00 ± 2.65 | 9.67 ± 0.58   | 86.67 ± 4.04  |
|                 | 700.00        | 251.67 ± 1.53 | 10.33 ± 0.58  | 93.33 ± 4.16  |
|                 | 25.00         | 5.00 ± 0.00   | 11.00 ± 1.00  | 24.67 ± 8.14  |
|                 | 50.00         | 9.67 ± 0.58   | 13.67 ± 0.58  | 42.67 ± 9.45  |
|                 | 100.00        | 18.67 ± 0.58  | 16.33 ± 5.77  | 48.67 ± 2.31  |
| THF             | 200.00        | 33.00 ± 0.00  | 20.33 ± 2.89  | 49.67 ± 2.52  |
|                 | 500.00        | 50.67 ± 0.58  | 21.33 ± 3.21  | 52.00 ± 0.00  |
|                 | 700.00        | 61.67 ± 1.53  | 20.00 ± 0.00  | 48.67 ± 1.15  |
|                 | 25.00         | 6.00 ± 0.00   | 5.67 ± 1.53   | 21.00 ± 3.00  |
|                 | 50.00         | 12.33 ± 0.58  | 14.67 ± 0.58  | 45.33 ± 1.53  |
|                 | 100.00        | 23.00 ± 1.00  | 16.00 ± 1.00  | 47.67 ± 8.08  |
| Pyridine        | 200.00        | 41.33 ± 1.53  | 17.33 ± 2.08  | 48.33 ± 3.51  |
|                 | 500.00        | 64.00 ± 0.00  | 18.67 ± 0.58  | 50.00 ± 2.65  |
|                 | 700.00        | 82.33 ± 1.15  | 27.67 ± 4.04  | 54.00 ± 3.46  |
|                 | 5.00          | 17.00 ± 0.00  | 7.67 ± 0.58   | 61.00 ± 5.29  |
|                 | 10.00         | 32.00 ± 0.00  | 7.67 ± 0.58   | 75.67 ± 3.21  |
|                 | 15.00         | 45.33 ± 1.53  | 8.00 ± 1.73   | 79.67 ± 1.53  |
|                 | 20.00         | 58.00 ± 1.00  | 8.00 ± 1.00   | 79.33 ± 2.08  |
|                 | 25.00         | 73.00 ± 2.00  | 9.00 ± 1.00   | 84.00 ± 7.94  |
|                 | 50.00         | 141.33 ± 1.53 | 10.33 ± 0.58  | 102.00 ± 1.73 |
| 100.00          | 163.00 ± 3.61 | 13.67 ± 2.89  | 107.00 ± 2.65 |               |
| 200.00          | 187.67 ± 2.31 | 14.67 ± 3.06  | 108.67 ± 6.66 |               |
| 500.00          | 292.33 ± 2.89 | 19.00 ± 1.00  | 108.33 ± 0.58 |               |
| 700.00          | 357.00 ± 7.21 | 23.67 ± 2.89  | 117.33 ± 1.15 |               |

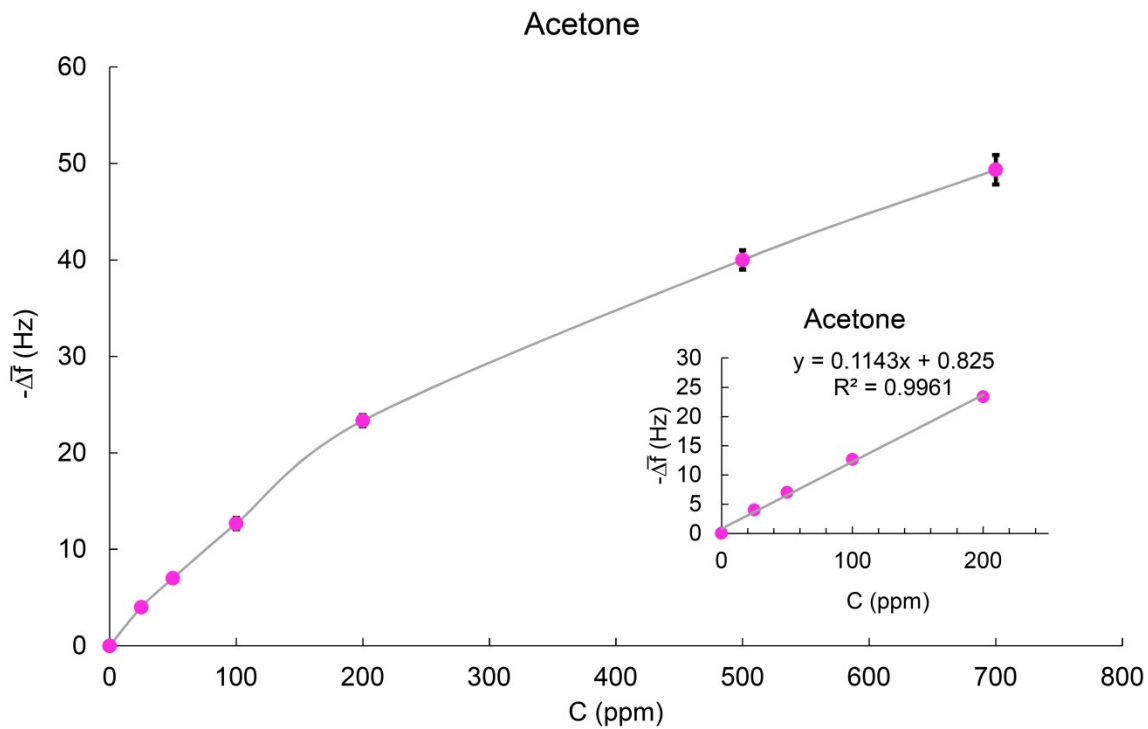

Fig. S15. Calibration curves of sensor to acetone

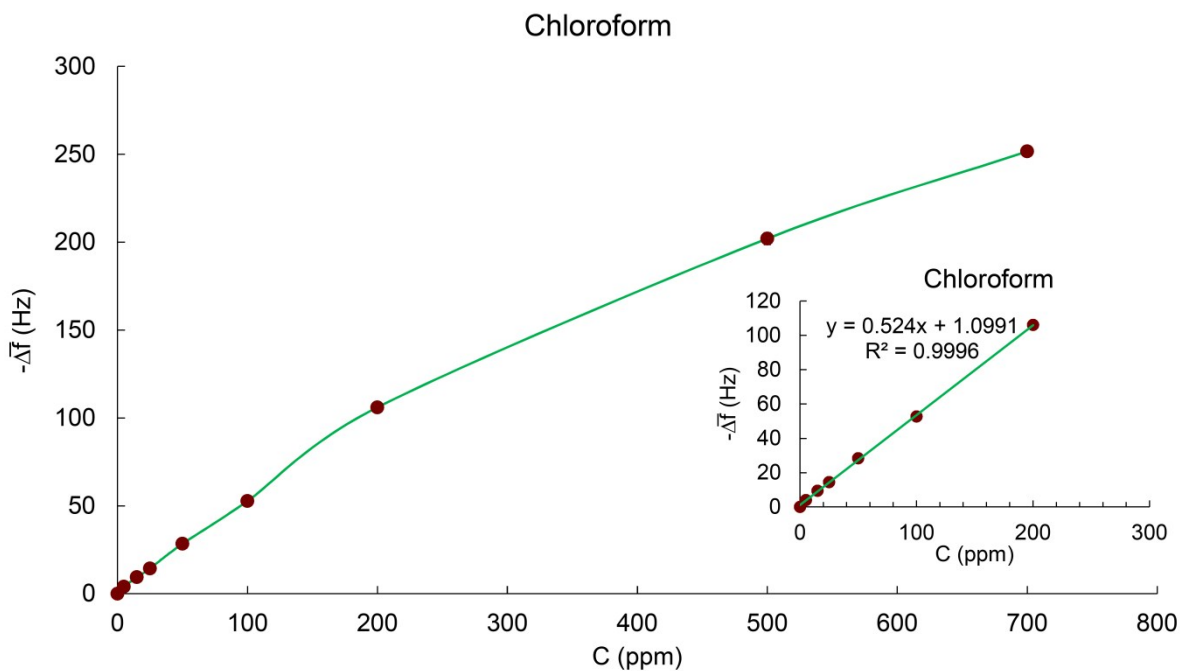

Fig. S16. Calibration curves of sensor to chloroform

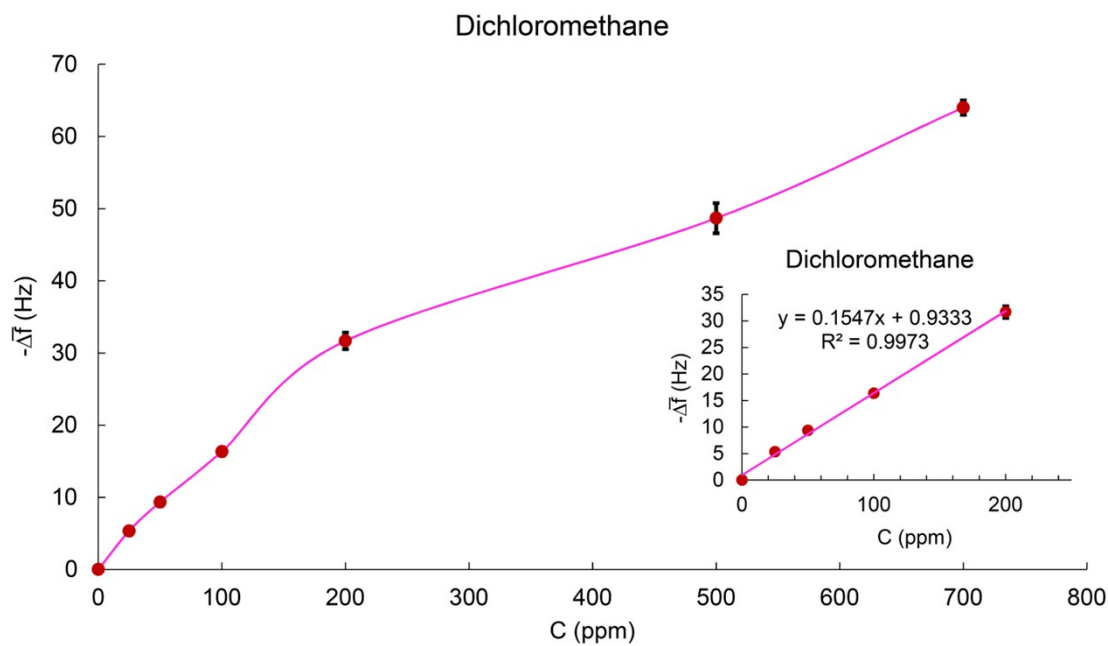

Fig. S17. Calibration curves of sensor to dichloromethane

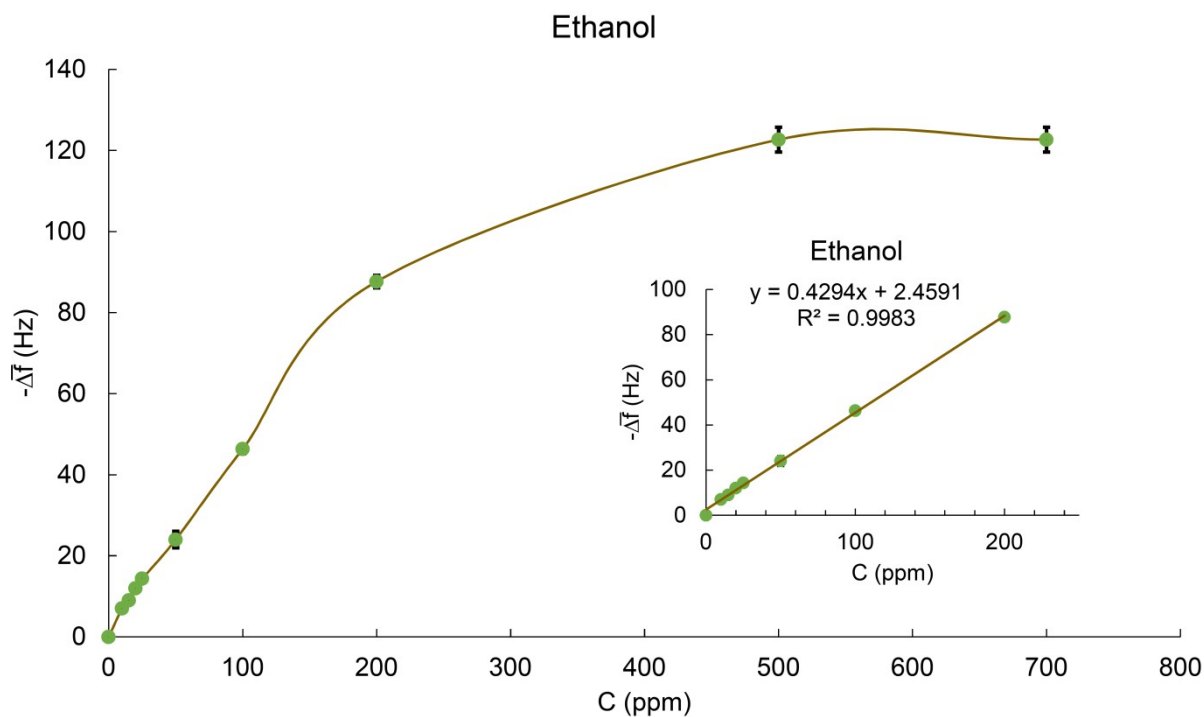

Fig. S18. Calibration curves of sensor to ethanol

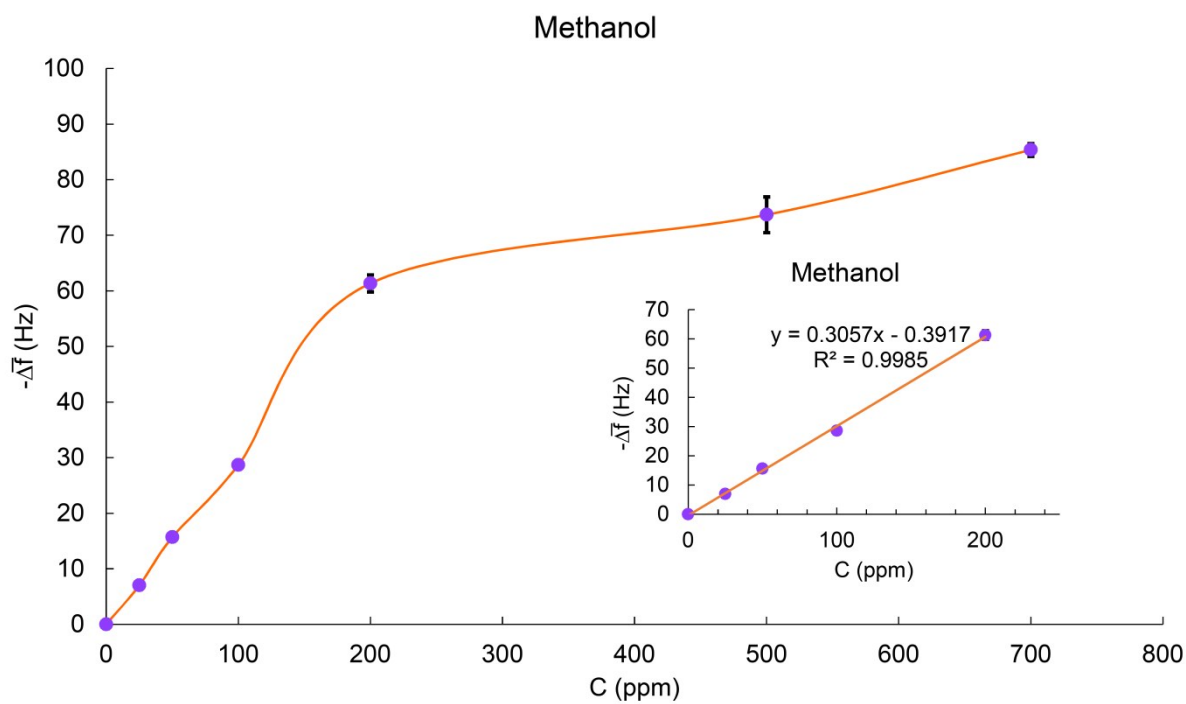

**Fig. S19.** Calibration curves of sensor to methanol

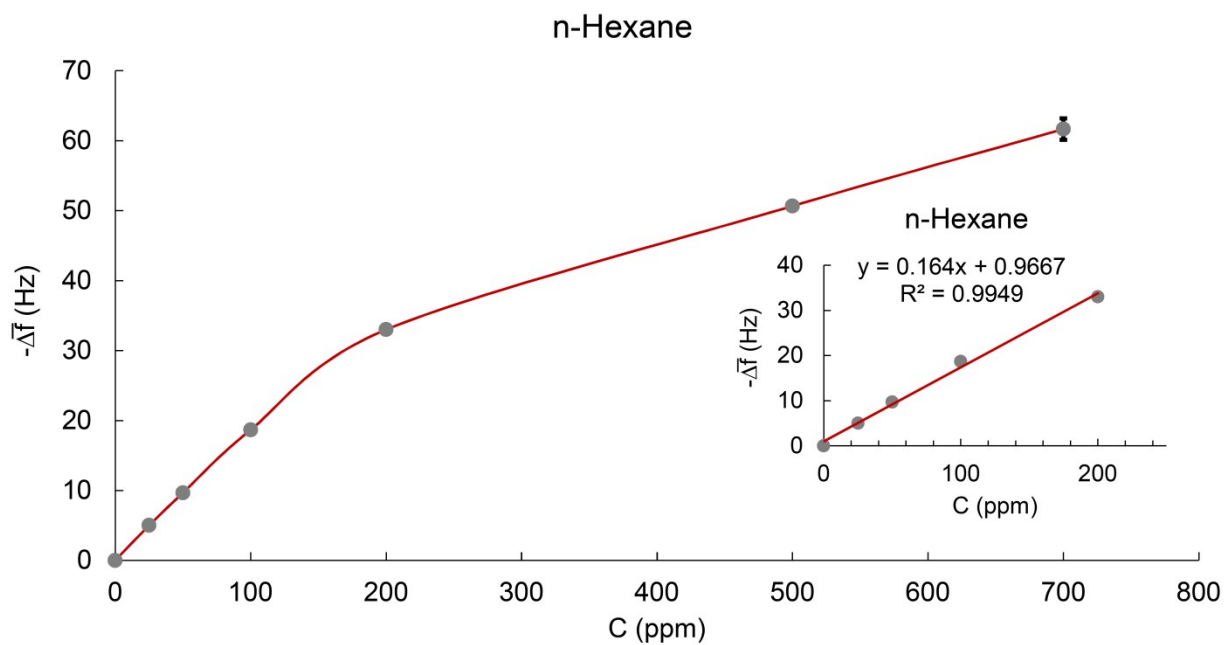

**Fig. S20.** Calibration curves of sensor to n-hexane

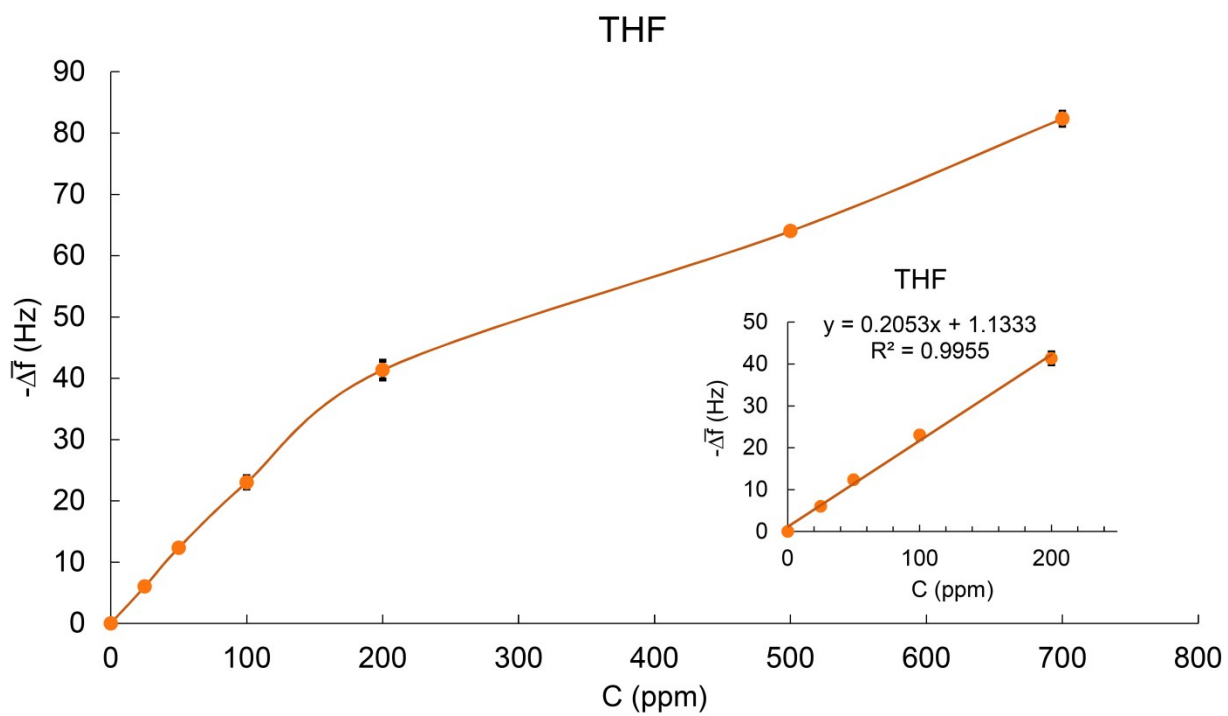

Fig. S21. Calibration curves of sensor to THF
